# Supplementary material for: A hexaazatrinaphthylene-based near-infrared photothermal organic small molecule for efficient photo-thermo-electric conversion
Source: Royal Society of Chemistry journal article supplement (doi:10.1039/d5cc06462g), 2026-01-01
Supplement: d5cc06462g1.pdf [file d5cc06462g1.pdf]

## ***Electronic Supplementary Information (ESI)***

### **Hexaazatrinaphthylene Based Near-infrared Photothermal Organic-Small-Molecule for Efficient Photo-Thermo-Electric Conversion**

*Ning-Ning Zhang,<sup>\*a,b</sup> Wei-Li Zheng,<sup>a</sup> Lin-Xu Liu,<sup>a</sup> Rong Ma,<sup>a</sup> Zhenyu Li,<sup>c,d</sup> Yongfang Han,<sup>a</sup> Wen-Wen Zi,<sup>a</sup> and Yong Yan<sup>\*a,d</sup>*

<sup>a</sup>School of Chemistry and Chemical Engineering, Liaocheng University, Liaocheng, Shandong 252000, P. R. China.

<sup>b</sup>Fujian Key Laboratory of Advanced Inorganic Oxygenated Materials, Fuzhou University, Fuzhou, Fujian 350108, P. R. China.

<sup>c</sup>School of Environmental and Materials Engineering, Yantai University, Yantai, 264005, P. R. China.

<sup>d</sup>State Key Laboratory of Structural Chemistry, Fujian Institute of Research on the Structure of Matter, Chinese Academy of Sciences, Fuzhou, Fujian 350108, P. R. China.

*\*Email: zhangningning@lcu.edu.cn (N. N. Zhang); yanyong@lcu.edu.cn (Y. Yan)*

## 1. Experimental section

**Materials.** All reagents were obtained from commercial sources and used without further purification. **HTA** was synthesized following a previously reported procedure.<sup>1</sup> The phase purity of **HTA** was confirmed by infrared (IR) spectrum (Fig. S1).

**Measurements.** Diffuse reflectance spectrum was measured at room temperature over the 250–1500 nm range using a Shimadzu UV-3600i Plus spectrophotometer equipped with an integrating sphere. A BaSO<sub>4</sub> plate was employed as the reference (100% reflectance), and finely ground sample powders were coated directly onto the reference plate. Electron paramagnetic resonance (EPR) spectra were recorded on a CIQTEK EPR-200Plus spectrometer operating in the X-band with a 100 kHz magnetic field modulation. Fourier-transform infrared (IR) spectra were collected in the range of 4000 to 400 cm<sup>-1</sup> on a Nicolet iS50 spectrometer.

**The NIR photothermal conversion measurement.** NIR-I/II photothermal conversion measurements were conducted by pressed pellets of **HTA** with lasers of 808 nm and 1064 nm produced by Changchun New Industries Optoelectronics Tech. Co., Ltd, respectively. The temperature of samples was recorded by a HIKMICRO K20 infrared camera. The temperature detecting range of the infrared camera was set as auto. The sample pellet with a diameter of 5 mm and a weight of 15.9 mg was prepared using a tablet press.

**The photo-thermo-electric conversion measurement.** The photo-thermo-electric conversion of **HTA** was investigated by integrating its sample powder with a commercial thermoelectric generator. Approximately 50 mg of **HTA** powder was uniformly coated onto the surface of the thermoelectric chip using a thin layer of thermally conductive adhesive. Simulated solar irradiation at intensities of 1 Sun (1000 W/m<sup>2</sup>), 2 Suns (2000 W/m<sup>2</sup>) and 4 Suns (4000 W/m<sup>2</sup>)

were provided by a xenon lamp (CEL-PF300-T9, CEAULIGHT) equipped with an attenuator, and the light intensity was measured using a TES1333 solar power meter. Three thermoelectric devices—TEC1-12701 ( $40 \times 40 \times 5.2 \text{ mm}^3$ ), TEC1-12703 ( $40 \times 40 \times 4.4 \text{ mm}^3$ ), and TEC1-12706 ( $40 \times 40 \times 3.8 \text{ mm}^3$ )—served as thermoelectric generators. The open-circuit voltage and current were measured with a Keithley 2450 source meter. Surface temperature variations during illumination were monitored using a HIKMICRO K20 infrared thermal camera.

**Calculation of optical absorption lines and spin density.** The structural models of g-HTA, s-[HTA]<sup>••</sup> and t-[HTA]<sup>••</sup> were constructed in GaussView 5.0 and optimized using the B3LYP<sup>2</sup> function with the 6-311G(d,p) basis set in Gaussian 16,<sup>3</sup> followed by time-dependent density functional theory (TD-DFT) calculations. The resulting wavefunction data were all analyzed using the Multiwfn program.<sup>4</sup>

## 2. Additional tables and graphics

**Table S1.** Reported photothermal materials and their performance in photo-thermo-electric conversion when integrating with thermoelectric generators under the irradiation of 1 Sun.

| Items                                                                                                                                     | Photo-thermo-electric conversion<br>(under 1 Sun) |                                                        | Reference                                                    |
|-------------------------------------------------------------------------------------------------------------------------------------------|---------------------------------------------------|--------------------------------------------------------|--------------------------------------------------------------|
|                                                                                                                                           | Open circuit<br>voltage (mV)                      | Maximum output<br>power density<br>(W/m <sup>2</sup> ) |                                                              |
| Organic-small-molecule photothermal materials                                                                                             |                                                   |                                                        |                                                              |
| HTA                                                                                                                                       | 211                                               | 0.69                                                   | This work                                                    |
| DDPA-PDN                                                                                                                                  | 83                                                | /                                                      | <i>Adv. Funct. Mater.</i> <b>2021</b> , 2106247              |
| GDPA-QCN                                                                                                                                  | 58                                                | /                                                      | <i>Angew. Chem. Int. Ed.</i> <b>2022</b> , e202117087        |
| Organic cocrystal photothermal materials                                                                                                  |                                                   |                                                        |                                                              |
| TQC                                                                                                                                       | 427                                               | 1.31                                                   | <i>ACS Energy Lett.</i> <b>2023</b> , 8, 4179–4185.          |
| Organic-inorganic hybrid photothermal materials                                                                                           |                                                   |                                                        |                                                              |
| {[BaMn(ONDI) <sub>2</sub> (H <sub>2</sub> O) <sub>3</sub> ]·H <sub>2</sub> O} <sub>n</sub> }                                              | 313                                               | 0.873                                                  | <i>Chem. Eng. J.</i> <b>2024</b> , 491, 152054.              |
| {[Ni <sub>4</sub> Cl <sub>2</sub> (OND I) <sub>2</sub> (bpy) <sub>4</sub> ]·2Cl·2H <sub>2</sub> O·xDMF·y H <sub>2</sub> O} <sub>n</sub> } | 250                                               | 0.53                                                   | <i>Chem. Eng. J.</i> <b>2024</b> , 499, 156059.              |
| Inorganic photothermal materials                                                                                                          |                                                   |                                                        |                                                              |
| NF@RGO-CNT                                                                                                                                | 58-59                                             | 0.251                                                  | <i>Ind. Eng. Chem. Res.</i> <b>2022</b> , 61, 16565–16576.   |
| Ni <sub>3</sub> S <sub>2</sub> /NF                                                                                                        | 59                                                | 0.175                                                  | <i>ACS Sustain. Chem. Eng.</i> <b>2020</b> , 8, 10833–10841. |
| CNT foam/PVA                                                                                                                              | 96.35                                             | 0.4                                                    | <i>ACS Appl. Nano Mater.</i> <b>2021</b> , 4, 8906–8912.     |
| PNPG/MoS <sub>2</sub>                                                                                                                     | 110                                               | 0.23                                                   | <i>ACS Appl. Mater. Interfaces.</i>                          |

|                                       |       |       |                                                                 |
|---------------------------------------|-------|-------|-----------------------------------------------------------------|
|                                       |       |       | <b>2022</b> , 14, 1034–1044.                                    |
| 3D porous CPP                         | 19.76 | 0.5   | <i>ACS Sustain. Chem. Eng.</i> <b>2021</b> , 9, 4571–4582.      |
| PCC sponge                            | 60    | 0.4   | <i>Adv. Energy Mater.</i> <b>2019</b> , 1900250                 |
| CNTP                                  | 100   | 0.24  | <i>Energy Convers. Manag.</i> <b>2021</b> , 241, 114306.        |
| MnO/C-600                             | 177   | 0.77  | <i>Chem. Eng. J.</i> <b>2023</b> , 451, 138534.                 |
| MC10                                  | 168.3 | 0.6   | <i>Energy Environ. Mater.</i> <b>2022</b> , 0, 1–9.             |
| PC-x hydrogels                        | 165.8 | 0.65  | <i>Chem. Eng. J.</i> <b>2023</b> , 458, 141511.                 |
| PCC-800                               | 201   | 0.8   | <i>ACS Sustain. Chem. Eng.</i> <b>2022</b> , 10, 16427–16439.   |
| MoS <sub>2</sub> -x NSAs              | 98.2  | 0.749 | <i>Energy Convers. Manag.</i> <b>2022</b> , 252, 115070.        |
| MS <sub>x</sub> -CPC                  | 110   | 1.087 | <i>Small</i> <b>2022</b> , 18, 2201949.                         |
| T-MSMD                                | 89    | 0.721 | <i>ACS Appl. Mater. Interfaces</i> <b>2021</b> , 13, 4305–4315. |
| <b>Polymer photothermal materials</b> |       |       |                                                                 |
| CP@PVA                                | 112.9 | 1.04  | <i>Sci. China Mater.</i> <b>2022</b> , 65, 2491–2501.           |

**Table S2.** Reported NIR-II photothermal materials and their photothermal conversion efficiency (PCE,  $\eta$ ) under the irradiation of a 1064 nm laser.

| Items                                                                | $\eta_{1064}$  | Reference                                                          |
|----------------------------------------------------------------------|----------------|--------------------------------------------------------------------|
| <b>Organic-small-molecules</b>                                       |                |                                                                    |
| BAF4                                                                 | 80 %           | <i>Angew. Chem. Int. Ed.</i> , <b>2021</b> , 60, 22376–22384       |
| CY-1234                                                              | 76.01 %        | <i>Small</i> , <b>2023</b> , 2307829                               |
| <b>2</b>                                                             | 62.26 %        | <i>Angew. Chem. Int. Ed.</i> , <b>2024</b> , e202400913            |
| <b>HTA</b>                                                           | <b>61.68 %</b> | <b>This work</b>                                                   |
| Zn <sub>4</sub> -H <sub>2</sub> Pc/DP                                | 58.3 %         | <i>Chem. Sci.</i> , <b>2019</b> , 10, 8246–8252                    |
| DAF-OH <sub>2</sub> CGBox-4 <sup>4+</sup>                            | 47.4 %         | <i>Angew. Chem. Int. Ed.</i> , <b>2023</b> , 135, e202301267       |
| DAF <sub>2</sub> CGBox-4 <sup>4+</sup>                               | 37.6%          |                                                                    |
| TTF <sub>2</sub> CGBox-4 <sup>4+</sup>                               | 39.9%          |                                                                    |
| CSM <sub>2</sub>                                                     | 31.6 %         | <i>Mater. Horiz.</i> , <b>2020</b> , 7, 1379–1386                  |
| <b>COFs</b>                                                          |                |                                                                    |
| CNPs                                                                 | 50.6 %         | <i>Chem. Commun.</i> , <b>2020</b> , 56, 7793–7796                 |
| Py-BPy-COF NPs                                                       | 55.2 %         | <i>J. Am. Chem. Soc.</i> , <b>2019</b> , 141, 14433–14442          |
| <b>HOFs</b>                                                          |                |                                                                    |
| TQC@PFC-1                                                            | 32 %           | <i>J. Mater. Chem. B</i> , <b>2023</b> , 11, 8649–8656             |
| <b>Complexes</b>                                                     |                |                                                                    |
| [Sr(BCA) <sub>2</sub> (H <sub>2</sub> O) <sub>2</sub> ] <sub>n</sub> | 84.5 %         | <i>Inorg. Chem. Front.</i> , <b>2024</b> , 11, 4867–4875           |
| Cu-THQNPs                                                            | 51.34%         | <i>ACS Appl. Mater. Interfaces</i> , <b>2018</b> , 10, 25203–25212 |
| Au@MOF                                                               | 48.5%          | <i>Nano Lett.</i> , <b>2019</b> , 19, 6772–6780                    |
| rPMo·cTMB                                                            | 48.4 %         | <i>Adv. Healthcare Mater.</i> , <b>2022</b> , 11, 2102352          |
| pMOF-a                                                               | 32.2 %         | <i>Chem. Commun.</i> , <b>2022</b> , 58, 11095–11098               |
| THPTS-Pb                                                             | 15.2 %         | <i>Inorg. Chem.</i> , <b>2024</b> , 63, 3327–3334                  |
| <b>Polymers</b>                                                      |                |                                                                    |

|                                 |         |                                                             |
|---------------------------------|---------|-------------------------------------------------------------|
| Y1                              | 67.9 %  | Chem. Sci., <b>2021</b> , 12, 5177–5184                     |
| Y2                              | 69.5 %  |                                                             |
| Y3                              | 76.5%   |                                                             |
| PBBTDTS                         | 65.0 %  | Chem. Commun., <b>2020</b> , 56, 1093–1096                  |
| SPNs3                           | 60.0 %  | Chem. Commun., <b>2019</b> , 55, 9487–9490                  |
| HPW@PANI                        | 57.76 % | Int. J. Nanomed., <b>2022</b> , 17, 5565–5579               |
| 2MPT <sup>2+</sup> •CB          | 54.6 %  | Angew. Chem., Int. Ed., <b>2019</b> , 58, 15526–15531       |
| N1@2P                           | 53.8 %  | Small, <b>2023</b> , 19, 2300203                            |
| P <sub>3</sub>                  | 46.0 %  | ACS Nano, <b>2019</b> , 13, 7345–7354                       |
| NP <sup>PSP</sup> -Pt           | 43.2 %  | Adv. Mater., <b>2023</b> , 35, 2300048                      |
| 2NDTA                           | 35 %    | Adv. Funct. Mater., <b>2024</b> , 2401627                   |
| SPNs                            | 21.2 %  | ACS Appl. Mater. Interfaces, <b>2020</b> , 12, 33492–33499. |
| SP1                             | 2.3 %   | Angew. Chem.Int. Ed., <b>2023</b> , 62, e202301617          |
| SP2                             | 46.4 %  |                                                             |
| SP3                             | 44.9 %  |                                                             |
| SP4                             | 46.5 %  |                                                             |
| SP5                             | 42.4 %  |                                                             |
| Inorganic materials             |         |                                                             |
| N-Doping CDs                    | 81.3 %  | Carbon, <b>2020</b> , 162, 220–233                          |
| AuPBs                           | 80.8 %  | ACS Nano, <b>2018</b> , 12, 2643–2651                       |
| Au <sub>3</sub> Cu nanocrystals | 75.2 %  | Nanoscale Horiz., <b>2018</b> , 3, 624–631                  |
| MoO <sub>2</sub> NPs            | 55.6 %  | Sci. China Mater., <b>2020</b> , 63, 1085–1098              |
| CS–RuO <sub>2</sub> NPs         | 52.5 %  | Chem. Commun., <b>2020</b> , 56, 3019–3022                  |
| Pd Ncap                         | 49.2 %  | ACS Appl. Mater. Interfaces, <b>2023</b> , 15, 39081–39098  |
| Sb-Doped SnO <sub>2</sub>       | 48.3 %  | Nanoscale, <b>2018</b> , 10, 2542–2554                      |
| Ni <sub>9</sub> S <sub>8</sub>  | 46.0 %  | Nanoscale, <b>2019</b> , 11, 20161–20170                    |
| Nb <sub>2</sub> C (MXene)       | 45.6 %  | J. Am. Chem. Soc., <b>2017</b> , 139, 16235–16247           |

|                                                                                  |         |                                                                    |
|----------------------------------------------------------------------------------|---------|--------------------------------------------------------------------|
| V <sub>2</sub> C                                                                 | 45.0 %  | <i>ACS Nano</i> , <b>2019</b> , 13, 1499–1510                      |
| TeO <sub>2</sub> /(NH <sub>4</sub> ) <sub>x</sub> WO <sub>3</sub><br>nanoribbons | 43.6 %  | <i>Nano Lett.</i> , <b>2019</b> , 19, 1179–1189                    |
| NIR-II-CD/BP<br>hybrids                                                          | 28.4 %  | <i>ACS Appl. Mater. Interfaces</i> , <b>2019</b> , 11, 44949–44960 |
| Si–Au                                                                            | 24.1 %  | <i>J. Mater. Chem. B</i> , <b>2019</b> , 7, 4393–4401              |
| EGaIn @SiO <sub>2</sub> -RGD                                                     | 22.43 % | <i>Nano Lett.</i> , <b>2019</b> , 19, 2128–2137                    |
| SnSe–PVP nanorods                                                                | 20.3 %  | <i>Mater. Horiz.</i> , <b>2018</b> , 5, 946–952                    |
| Au NSs                                                                           | 13.0 %  | <i>J. Mater. Chem. B</i> , <b>2019</b> , 7, 2001–2008              |

**Table S3** List of the triplet diradical states for t-[HTA]<sup>••</sup> (the lowest singly unoccupied molecular orbital (SUMO) and the singly occupied molecular orbital (SOMO))

| Excited State | Wavelength (nm)   | Oscillator strength | Electronic transition (%)                                |
|---------------|-------------------|---------------------|----------------------------------------------------------|
| 4             | <b>1186.14 nm</b> | 0.0056              | $\beta$ -SOMO-1 $\rightarrow$ $\beta$ -SUMO (98.37 %)    |
| 6             | <b>1012.84 nm</b> | 0.0097              | $\alpha$ -SOMO $\rightarrow$ $\alpha$ -SUMO (81.837 %)   |
| 7             | <b>956.95 nm</b>  | 0.0335              | $\alpha$ -SOMO $\rightarrow$ $\alpha$ -SUMO+1 (87.643 %) |
| 8             | <b>827.20 nm</b>  | 0.0735              | $\beta$ -SOMO-5 $\rightarrow$ $\beta$ -SUMO (77.695 %)   |
| 9             | <b>754.18 nm</b>  | 0.0009              | $\beta$ -SOMO-6 $\rightarrow$ $\beta$ -SUMO (89.755 %)   |
| 10            | <b>718.86 nm</b>  | 0.0003              | $\beta$ -SOMO-9 $\rightarrow$ $\beta$ -SUMO (85.643 %)   |
| 12            | <b>618.26 nm</b>  | 0.0588              | $\alpha$ -SOMO $\rightarrow$ $\alpha$ -SUMO+2 (81.837 %) |
| 15            | <b>547.81 nm</b>  | 0.0748              | $\beta$ -SOMO-11 $\rightarrow$ $\beta$ -SUMO (68.022 %)  |



**Table S4** List of the molecular orbitals for [HTA]<sup>••</sup>

| Energy level                          | [HTA] <sup>••</sup>                                                                 | Energy level                           | [HTA] <sup>••</sup>                                                                   |
|---------------------------------------|-------------------------------------------------------------------------------------|----------------------------------------|---------------------------------------------------------------------------------------|
| <b><i>α</i>-SOMO</b><br>(-4.938 eV)   | 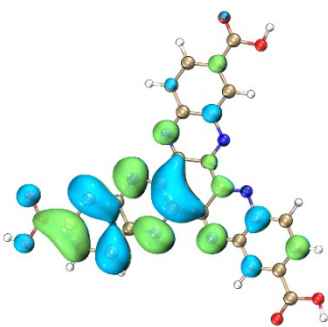   | <b><i>β</i>-SOMO-11</b><br>(-8.459 eV) |    |
| <b><i>α</i>-SUMO</b><br>(-3.076 eV)   |   | <b><i>β</i>-SOMO-9</b><br>(-8.209 eV)  |   |
| <b><i>α</i>-SUMO+1</b><br>(-3.005 eV) |  | <b><i>β</i>-SOMO-6</b><br>(-7.758 eV)  |  |
| <b><i>α</i>-SUMO+2</b><br>(-1.945 eV) |  | <b><i>β</i>-SOMO-5</b><br>(-7.503 eV)  |  |

|  |  |                               |                                                                                     |
|--|--|-------------------------------|-------------------------------------------------------------------------------------|
|  |  | $\beta$ SOMO-1<br>(-6.999 eV) | 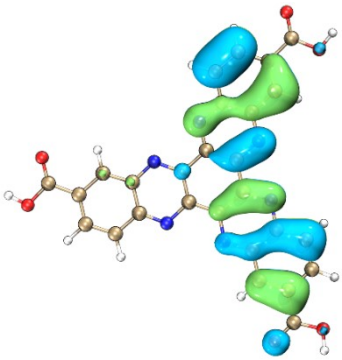 |
|  |  | $\beta$ SUMO<br>(-5.506 eV)   |  |

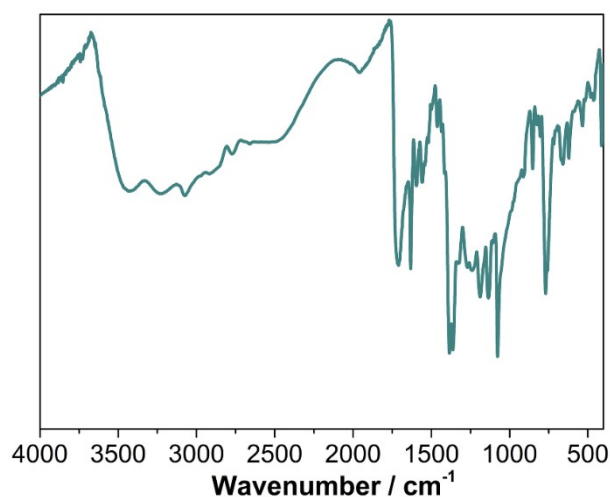

**Fig. S1** IR spectrum of **HTA**.

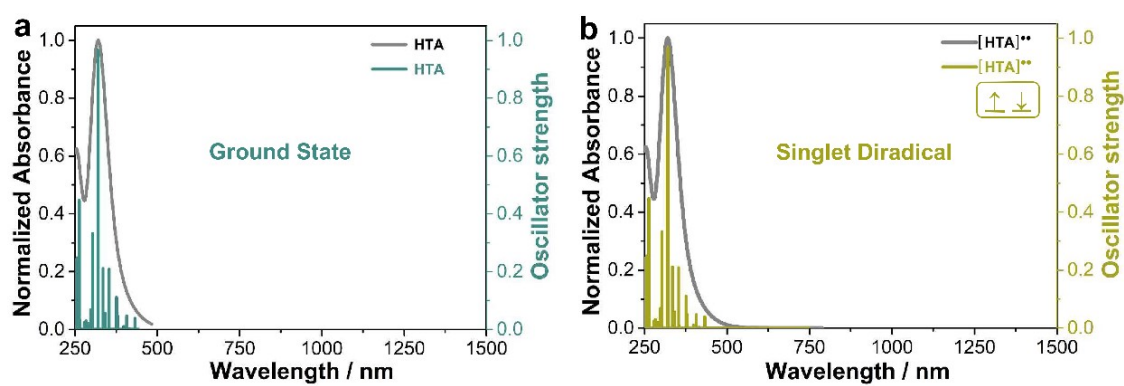

**Fig. S2** Calculated optical absorption curves and lines of **HTA** based on ground state (a) and singlet diradical state (b).

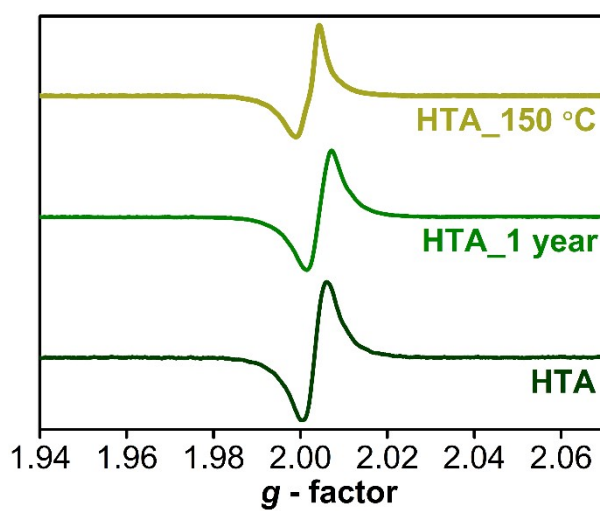

**Fig. S3** Solid-state EPR spectra of **HTA** (dark green solid line), the sample **HTA** stored in air

for one year (green solid line) and the sample HTA after annealing at 150 °C for 12 hours (grass green solid line).

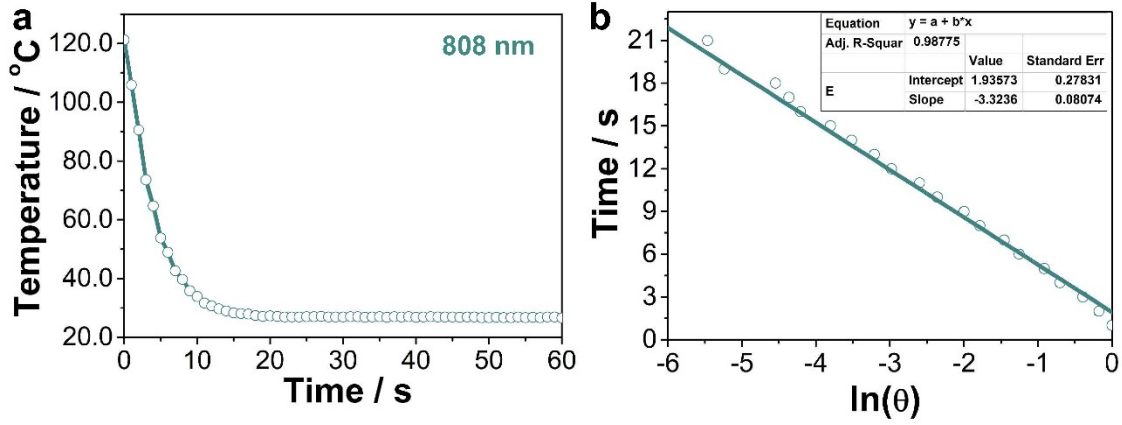

**Fig. S4** Temperature decaying curve of compound HTA after removing the laser source of 808 nm (1.25 W/cm<sup>2</sup>) (a) and the corresponding time-lnθ linear curve (b). The photothermal conversion efficiency ( $\eta_{808} = 71.09\%$ ) was also calculated based on reported method<sup>5</sup>:  $\eta_{808} =$

$$\frac{hS\Delta T_{max}}{I(1 - 10^{-A_{808}})}$$
 where the  $I$  is the laser power (1.25 W/cm<sup>2</sup>),  $A_{808}$  is the absorbance of the samples at the wavelength of 808 nm (0.50, F(R)), and  $\Delta T_{max}$  is the maximum temperature

change (94.6 K).  $hs$  can be calculated based on the formula of  $\tau_s = \frac{\sum_i m_i C_{p,i}}{hs}$ , where  $\tau_s$  is the sample system time constant,  $m_i$  (0.0159 g) and  $C_{p,i}$  (1.33 J·(g·°C)<sup>-1</sup>) are the mass and heat capacity of system components. When the laser turns off,  $\tau_s$  can be estimated according to the

formula:  $t = -\tau_s \ln \theta$ . The  $\theta$  can be obtained according to the formula:  $\theta = \frac{T - T_{surr}}{T_{max} - T_{surr}}$ , where  $T$  is the temperature of sample,  $T_{max}$  is the maximum system temperature, and  $T_{surr}$  is the environment temperature.

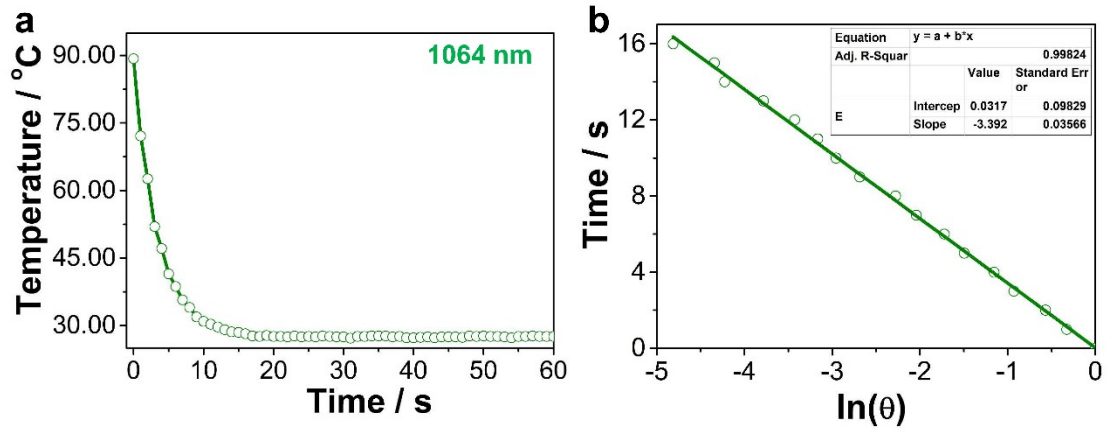

**Fig. S5** Temperature decaying curve of compound **HTA** after removing the laser source of 1064 nm (1.25 W/cm<sup>2</sup>) (a) and the corresponding time-lnθ linear curve (b). The photothermal conversion efficiency ( $\eta_{1064} = 61.68\%$ ) was also calculated based on reported method<sup>1</sup>:  $\eta_{1064} =$

$\frac{hS\Delta T_{max}}{I(1 - 10^{-A_{1064}})}$ , where the  $I$  is the laser power (1.25 W/cm<sup>2</sup>),  $A_{1064}$  is the absorbance of the samples at the wavelength of 1064 nm (0.31, F(R)), and  $\Delta T_{max}$  is the maximum temperature

$$\sum_i m_i C_{p,i}$$

change (63.7 K).  $hs$  can be calculated based on the formula of  $\tau_s = \frac{\sum_i m_i C_{p,i}}{hs}$ , where  $\tau_s$  is the sample system time constant,  $m_i$  (0.0159 g) and  $C_{p,i}$  (1.33 J·(g·°C)<sup>-1</sup>) are the mass and heat capacity of system components. When the laser turns off,  $\tau_s$  can be estimated according to the

formula:  $t = -\tau_s \ln \theta$ . The  $\theta$  can be obtained according to the formula:  $\theta = \frac{T - T_{surr}}{T_{max} - T_{surr}}$ , where  $T$  is the temperature of sample,  $T_{max}$  is the maximum system temperature, and  $T_{surr}$  is the environment temperature.

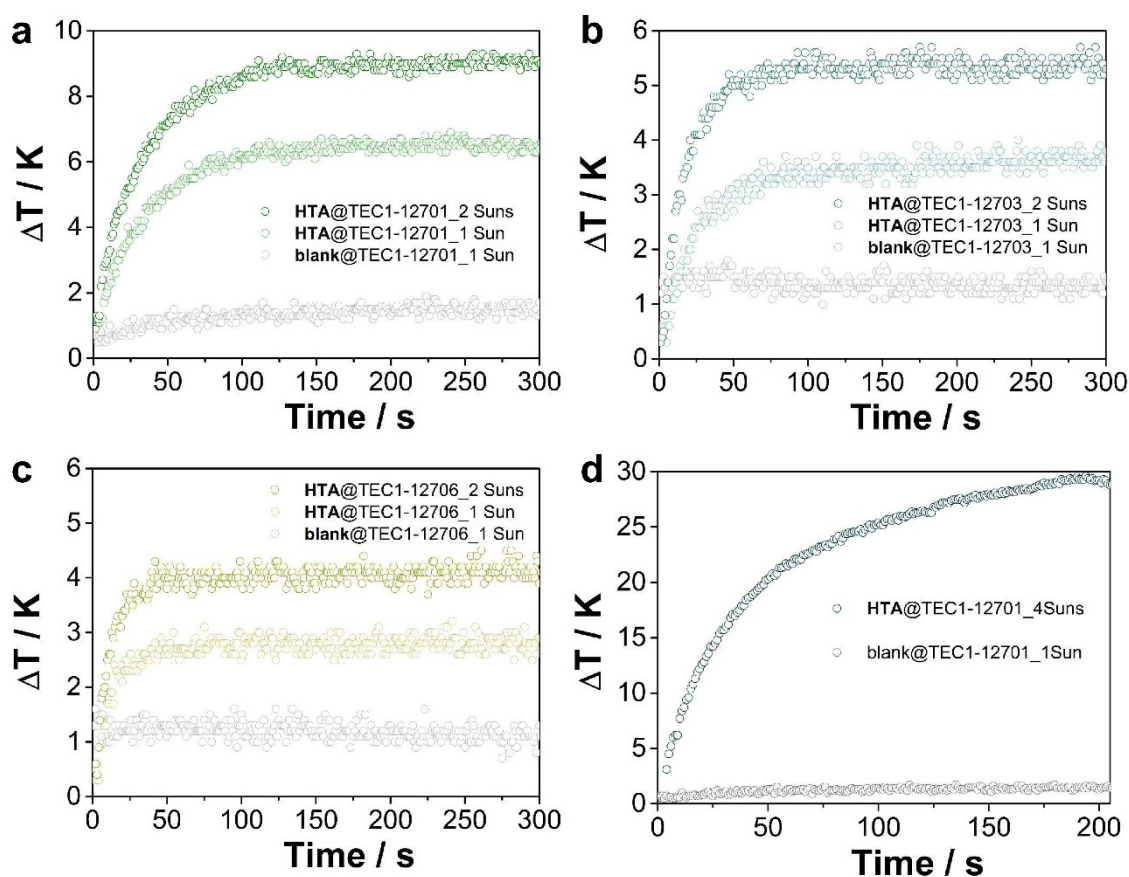

**Fig. S6** (a-c) The temperature difference ( $\Delta T$ ) of different photo-thermo-electric conversion devices under the irradiation of 1 Sun and 2 Suns. (d) The temperature difference ( $\Delta T$ ) of HTA@TEC1-12701 under the irradiation of 4 Suns.

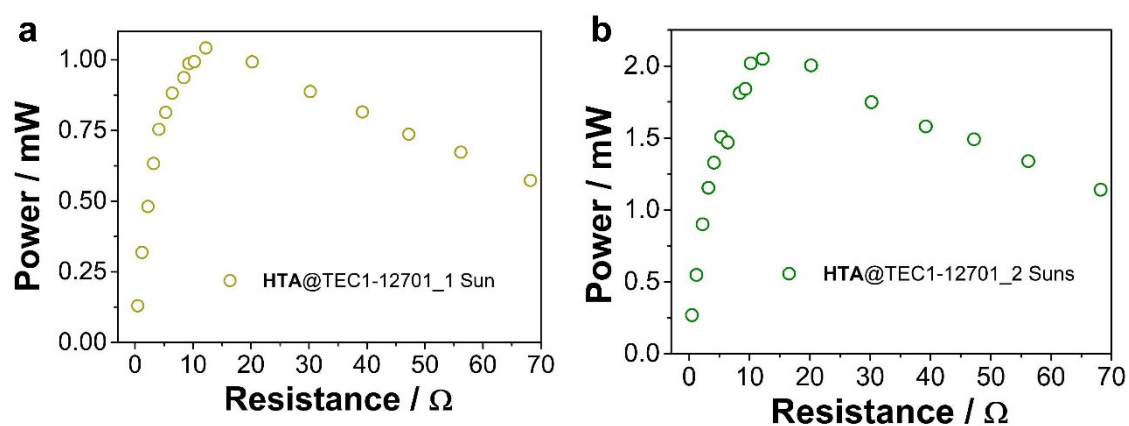

**Fig. S7** Output power of HTA@TEC1-12701 under irradiation of 1 Sun (a) and 2 Suns (b) when loading different external resistances, respectively.

### Movie S1.

A device HTA@TEC1-12701 drives a small fan under 4 Suns.

### 3. Reference

1. J. Wang, K. Tee, Y. Lee, S. N. Riduan and Y. Zhang, Hexaazatriphenylene derivatives/GO composites as organic cathodes for lithium ion batteries. *J. Mater. Chem. A* 2018, **6**, 2752–2757.
2. L. A. Curtiss, P. C. Redfern, K. Raghavachari, J. A. Pople, Gaussian-3X (G3X) theory: Use of improved geometries, zero-point energies, and Hartree–Fock basis sets. *J. Chem. Phys.* 2001, **114**, 108–117.
3. M. J. Frisch, G. W. Trucks, H. B. Schlegel, G. E. Scuseria, M. A. Robb, J. R. Cheeseman, G. Scalmani, V. Barone, G. A. Petersson, H. Nakatsuji, X. Li, M. Caricato, A. V. Marenich, J. Bloino, B. G. Janesko, R. Gomperts, B. Mennucci, H. P. Hratchian, J. V. Ortiz, A. F. Izmaylov, J. L. Sonnenberg, D. Williams-Young, F. Ding, F. Lipparini, F. Egidi, J. Goings, B. Peng, A. Petrone, T. Henderson, D. Ranasinghe, V. G. Zakrzewski, J. Gao, N. Rega, G. Zheng, W. Liang, M. Hada, M. Ehara, K. Toyota, R. Fukuda, J. Hasegawa, M. Ishida, T. Nakajima, Y. Honda, O. Kitao, H. Nakai, T. Vreven, K. Throssell, J. A. Montgomery Jr., J. E. Peralta, F. Ogliaro, M. J. Bearpark, J. J. Heyd, E. N. Brothers, K. N. Kudin, V. N. Staroverov, T. A. Keith, R. Kobayashi, J. Normand, K. Raghavachari, A. P. Rendell, J. C. Burant, S. S. Iyengar, J. Tomasi, M. Cossi, J. Millam, M. Klene, C. Adamo, R. Cammi, J. W. Ochterski, R. L. Martin, K. Morokuma, O. Farkas, J. B. Foresman and D. J. Fox, *Gaussian 16, Rev. C.01*, Gaussian, Inc., Wallingford CT, 2016.
4. T. Lu, F. W. Chen, Multiwfn: A multifunctional wavefunction analyzer. *J. Comput. Chem.* 2012, **33**, 580–592.
5. S. Wang, S. Li, J. Xiong, Z. Lin, W. Wei, Y. Xu, Near-infrared photothermal conversion of stable radicals photoinduced from a viologen-based coordination polymer. *Chem. Commun.* 2020, **56**, 7399–7402.
